# Supplementary material for: The impact of aluminum impurity on the regenerated lithium nickel cobalt manganese oxide cathode materials from spent LIBs
Source: Royal Society of Chemistry journal article supplement (doi:10.1039/c7nj01206c), 2017-01-01
Supplement: c7nj01206c1.pdf [file c7nj01206c1.pdf]

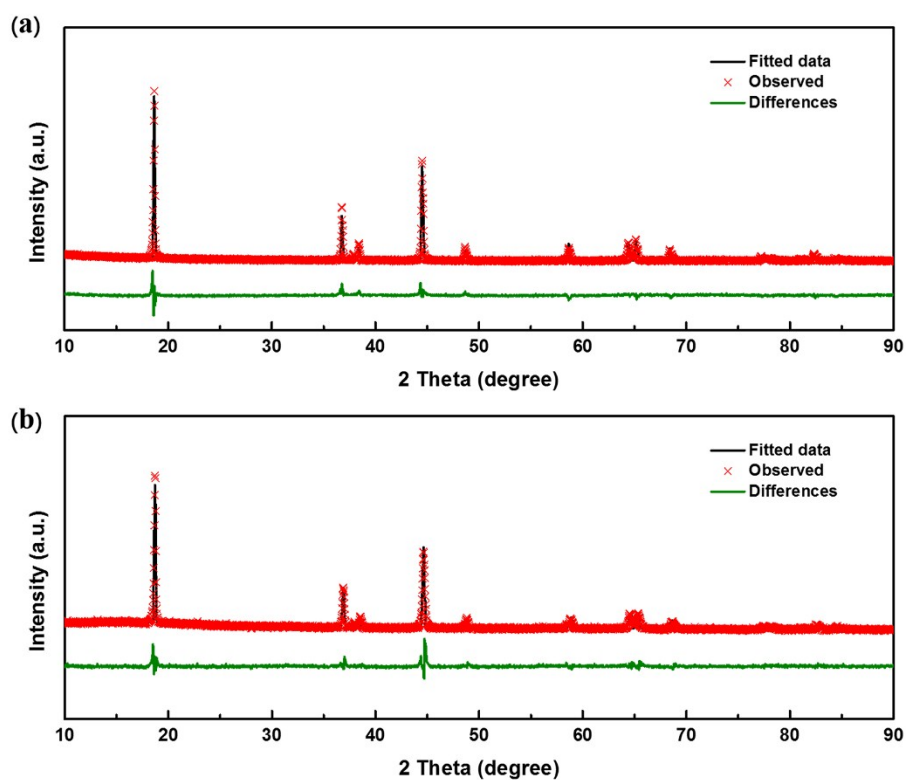

Fig. S1 Refined XRD patterns of (a) R0 and (b) R5.

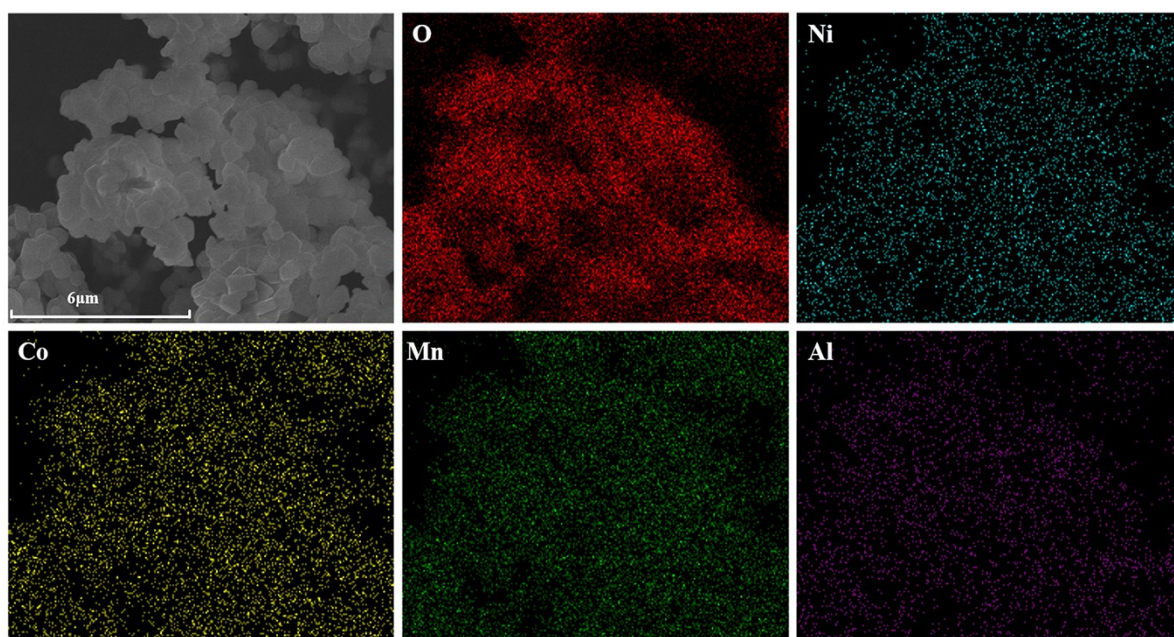

Fig. S2 EDS images of regenerated cathode material.

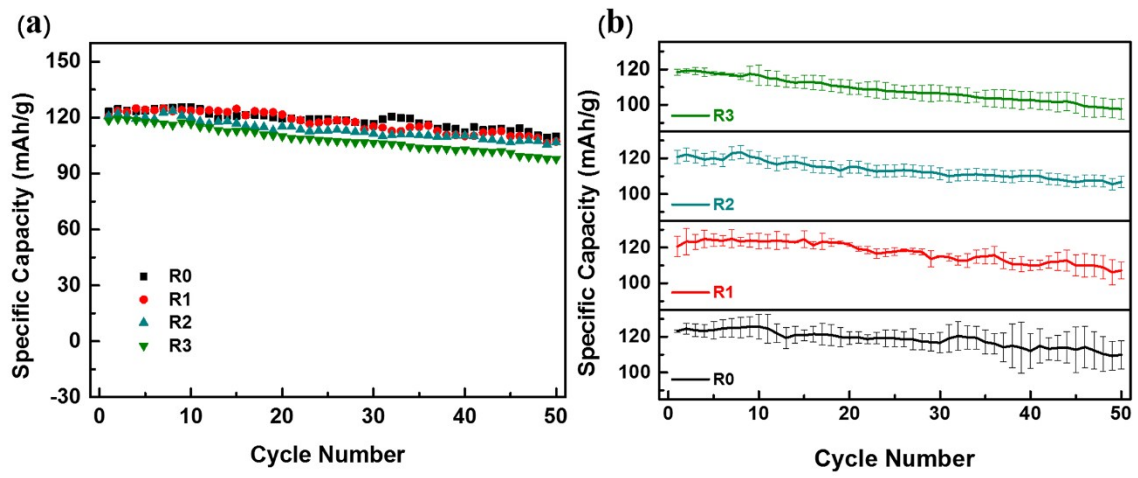

Fig. S3 (a) Averaged specific capacity and (b) standard deviation of R0, R1, R2 and R3 between 2.5 and 4.5 V at 0.5 C.

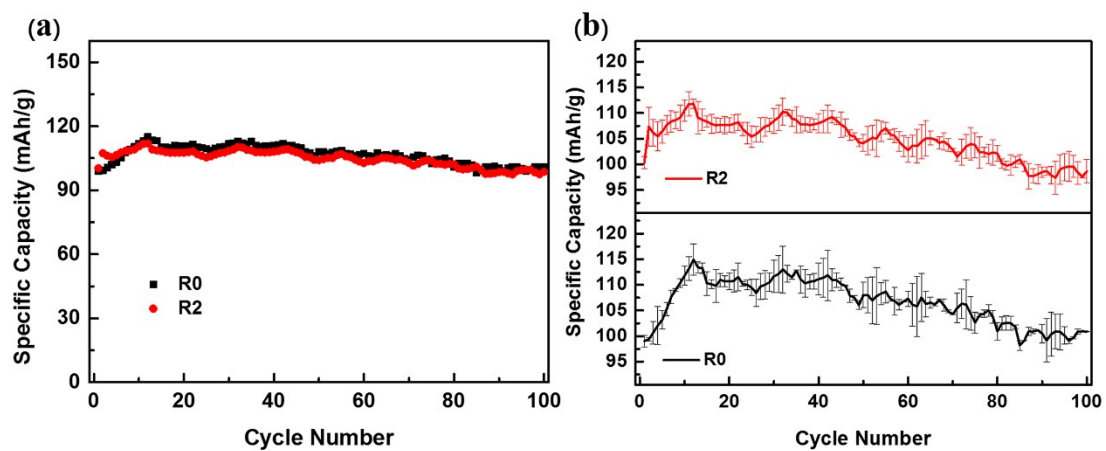

Fig. S4 (a) Cycling properties and (b) standard deviation of R0 and R2 between 2.5 and 4.3 V at 0.5 C.
